# Supplementary material for: Transcriptome Analysis of Particulate Matter 2.5-Induced Abnormal Effects on Human Sebocytes
Source: MDPI journal article supplement (doi:10.3390/ijms231911534), 2022-09-29
Supplement: s1 [file s1]

## Supplementary Materials

### Transcriptome analysis of particulate matter 2.5-induced abnormal effects on human sebocytes

Hye-Won Na<sup>1</sup>, Hyun Soo Kim<sup>2</sup>, Hyunjung Choi<sup>1</sup>, Nari Cha<sup>1</sup>, Young Rok Seo<sup>2</sup>, Yong Deog Hong<sup>1</sup>, Hyoung-June Kim<sup>1\*</sup>

<sup>1</sup> Research and Innovation Center, AMOREPACIFIC, Yongin 17074, Gyeonggi-do, Korea

<sup>2</sup> Department of Life Science, Institute of Environmental Medicine, Dongguk University Biomed Campus, Goyang 10326, Korea

\* Correspondence: leojune@amorepacific.com; Tel.: 82-31-280-5827; Fax: 82-31-899-2595

## **Supplementary materials and methods**

### ***Cell viability test***

Cell viability was assessed using the Cell Counting Kit-8 (Dojindo Laboratories, Kumamoto, Japan) according to the manufacturer's protocol.

### ***RNA-sequencing (RNA-seq) and differential expression analysis***

SZ95 sebocytes treated with 20% ethanol or PM<sub>2.5</sub> were used in RNA-sequencing. Total RNA was isolated using Trizol (QIAzol Lysis Reagent; Qiagen, Hilden, Germany) and qualified using a 2100 Bioanalyzer (Agilent, Santa Clara, CA, USA.). cDNA libraries were generated using the TruSeq Stranded mRNA LT Sample Prep Kit (Illumina, San Diego, CA, USA) according to the manufacturer's guidelines. All samples were sequenced with 101 bp paired-end reads using Illumina HiSeq 2500 according to the user guide. The libraries were quantified using quantitative real-time PCR (qPCR) according to the Illumina qPCR Quantification Protocol Guide and Roche Rapid Library Standard Quantification solution and calculator. An Agilent Technologies 2100 Bioanalyzer using a DNA 1000 chip was used to determine the template size distribution. To remove adapter contamination, reads were trimmed using Trimmomatic 0.32 [46]. The trimmed reads were mapped to the human genome (UCSC hg19) using HISAT2 (version 2.0.5) [47] and assembled using StringTie (version 1.3.3b) [48,49]. The abundance and gene levels were determined based on the

fragments per kilobase of transcript per million fragments mapped. Analysis of differently expressed genes (DEGs) was performed using DESeq2. Raw *p*-values from differential expression analyses were determined using the negative binomial Wald test, and adjusted *p*-values were determined using the Benjamini and Hochberg test.

### ***Gene set enrichment analysis and Ingenuity Pathway Analysis (IPA)***

Gene set enrichment analysis of DEGs was performed using the Gene Ontology (GO, <http://geneontology.org/>) and Kyoto Encyclopedia of Genes and Genomes (KEGG, <http://www.genome.jp/kegg/>) databases. Subsequently, IPA (Qiagen) was used to predict the canonical pathways, upstream regulators, and downstream effects related to disease and biological functions [50].

### ***Real-time qPCR analysis***

The parameters were as follows: initial denaturation (10 min), 40 cycles of amplification at 95 °C (15 s), and annealing and extension at 60 °C (60 s). The data were analyzed using the  $2^{-\Delta\Delta C_t}$  method. The following TaqMan probes (Applied Biosystems) were used: cytochrome P450 family 1 subfamily A member 1 (CYP1A1; Hs01054797\_g1), CYP1B1 (Hs00164383\_m1), aryl-hydrocarbon receptor repressor (AHRR; Hs01005075\_m1), metallothionein 1E (MT1E; Hs01938284\_g1), CYP3A7 (Hs02511627\_s1), sulfotransferase family 1E member 1 (SULT1E1; Hs00960938\_m1),

aldehyde dehydrogenase 1 family member A1 (ALDH1A1; Hs00946916\_m1), interleukin 1 beta (IL1B; Hs01555410\_m1), IL6 (Hs00174131\_m1), tumor necrosis factor superfamily member 10 (TNFSF10; Hs00921974\_m1), klotho (KL; Hs00934627\_m1), prostaglandin-endoperoxide synthase 1 (PTGS1; Hs00377726\_m1), acyl-CoA oxidase like (ACOXL; Hs01102524\_m1), stearoyl-CoA desaturase (SCD; Hs01682761\_m1), insulin induced gene 1 (INSIG1; Hs00356479\_g1), 3-hydroxy-3-methylglutaryl-CoA synthase 1 (HMGCS1; Hs00940429\_m1), insulin receptor substrate 1 (IRS1; Hs00178563\_m1), claudin11 (Hs00194440\_m1), claudin1 (Hs00221623\_m1), retinol dehydrogenase 10 (RDH10; Hs00416907\_m1), retinoic acid receptor beta (RARβ; Hs00977140\_m1), hydroxysteroid 17-beta dehydrogenase 1 (HSD17B1; Hs00166219\_g1), and ribosomal protein L13a (RPL13A; Hs04194366\_g1).

### *Antibodies for western blotting of cell lysates*

The following antibodies were used: CYP1A1 (sc-25304) and sterol regulatory element binding transcription factor 1 (SREBP1; sc-13551) from Santa Cruz (Paso Robles, CA, USA) and CYP1B1 (ab185954); IL1B (ab9722), SCD (ab19862), and HMGCS1 (ab155787) from Abcam (Waltham, MA, USA); Claudin1 (H00009076-M01; novus, Centennial, CO, USA); and SREBP2 (MAB7119; R&D Systems, Minneapolis, MN, USA). Mitogen-activated protein kinase (MAPK) kinase 5 (MAP2K5; PA5-29236) and pMAP2K5 (PA5-37701) were from Invitrogen. MAPK7 (#3372), pMAPK7 (#3371), pSMAD3 (#9520), SMAD3 (#9523), Forkhead Box O3 (FoxO3a; #12829) and GAPDH

(#2118) were from Cell Signaling Technology (Beverly, MA, USA). Detection was performed using horseradish peroxidase-conjugated anti-mouse IgG or goat anti-rabbit secondary antibodies (Cell Signaling Technology). Detection was performed using a chemiluminescence reagent (SuperSignal West; Thermo Fisher Scientific, Cleveland, OH, USA).

### *Measurement of lipid contents*

Quantification of lipids containing squalene, triglycerides, and free fatty acids (FA) was performed using 20% ethanol- or PM<sub>2.5</sub>-treated SZ95 sebocytes. To measure the levels of lipids containing squalene, triglycerides, and free fatty acids (FA), lipid extraction was performed using the Folch method with minor modifications [51]. Briefly, RIPA lysis buffer with a complete protease inhibitor cocktail together with harvested cell pellets were homogenized. Protein levels were determined using a Thermo Protein Assay Kit (Pierce, Rockford, IL, USA) according to the manufacturer's instructions.

Quantification of squalene lipid extraction was performed as previously reported [52], with minor modifications. The squalene level (expressed as nmol/mg protein) was quantified using an HPLC system equipped with a photodiode array detector at a wavelength of 205 nm (Agilent 1260 HPLC system; Agilent).

To measure triglyceride, free cholesterol, and free FA levels, the cell lysates were

lysed and sonicated in methanol–chloroform (1:2, v/v) containing butylated hydroxytoluene (500 µg/mL), followed by the addition of 500 pmol docosahexaenoic acid, cholesterol-d<sub>6</sub>, and 1,3-heptadecanoin-2-heptadecanoin glyceride (d<sub>5</sub>-TG 51:1) as an internal standard. The extracted lipids were dried in a vacuum system, re-dissolved in methanol, and analyzed using liquid chromatography–electrospray ionization–tandem mass spectrometry (LC–ESI–MS/MS; API 5500 QTrap mass; Applied Biosystems/MDS Sciex, Toronto, Canada) in the selective ion monitoring mode. Free cholesterol and FAs were separated using reverse-phase HPLC (ExionLC™ Series UHPLC, Applied Biosystems, Waltham, MA, USA) on a Kinetex C18 column (2.1 × 100 mm, internal diameter: 2.6 µm; Phenomenex, St. Louis, MO, USA), as previously reported [53,54]. All data were acquired using the Analyst 1.7.1 software (Applied Biosystems).

### ***Human skin tissue model and immunohistochemistry***

Human skin explant HairSkin® models purchased from Genoskin (Toulouse, France) were collected from the skin biopsies of healthy donors. Genoskin obtained the samples with the informed consent of the individual donors, and the procedure was approved and authorized by the French Ethics Committee (Comité de Protection de Personnes) and the French Ministry of Research (AC-2017-2897, 12 Oct 2017). The sliced paraffin-embedded tissues were stained with the following antibodies; cytokeratin 7 (CK7; MA1-90894; Invitrogen), claudin1 (H00009076-M01; novus), and

SREBP1 (NB100-2215; novus). Mucin 1 (MUC1; ab15481), CYP1B1 (ab185954), IL1B (ab9722), and IL6 (ab6672) were purchased from Abcam.

### Supplementary Figures

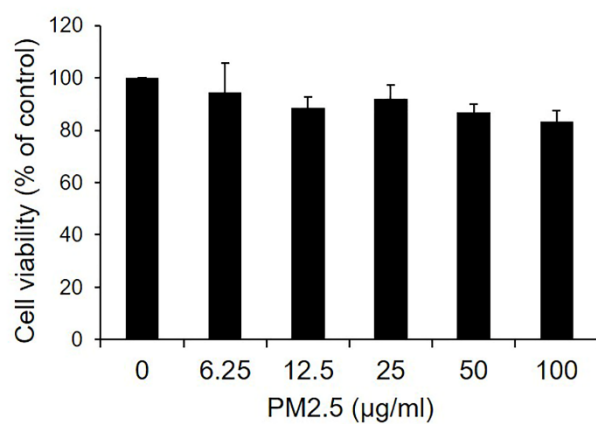

**Figure S1.** Effect of PM<sub>2.5</sub> on cell viability. SZ95 sebocytes were treated with different concentrations of PM<sub>2.5</sub> for 24 h to test cell viability. Cell viability was determined by a CCK-8 assay.



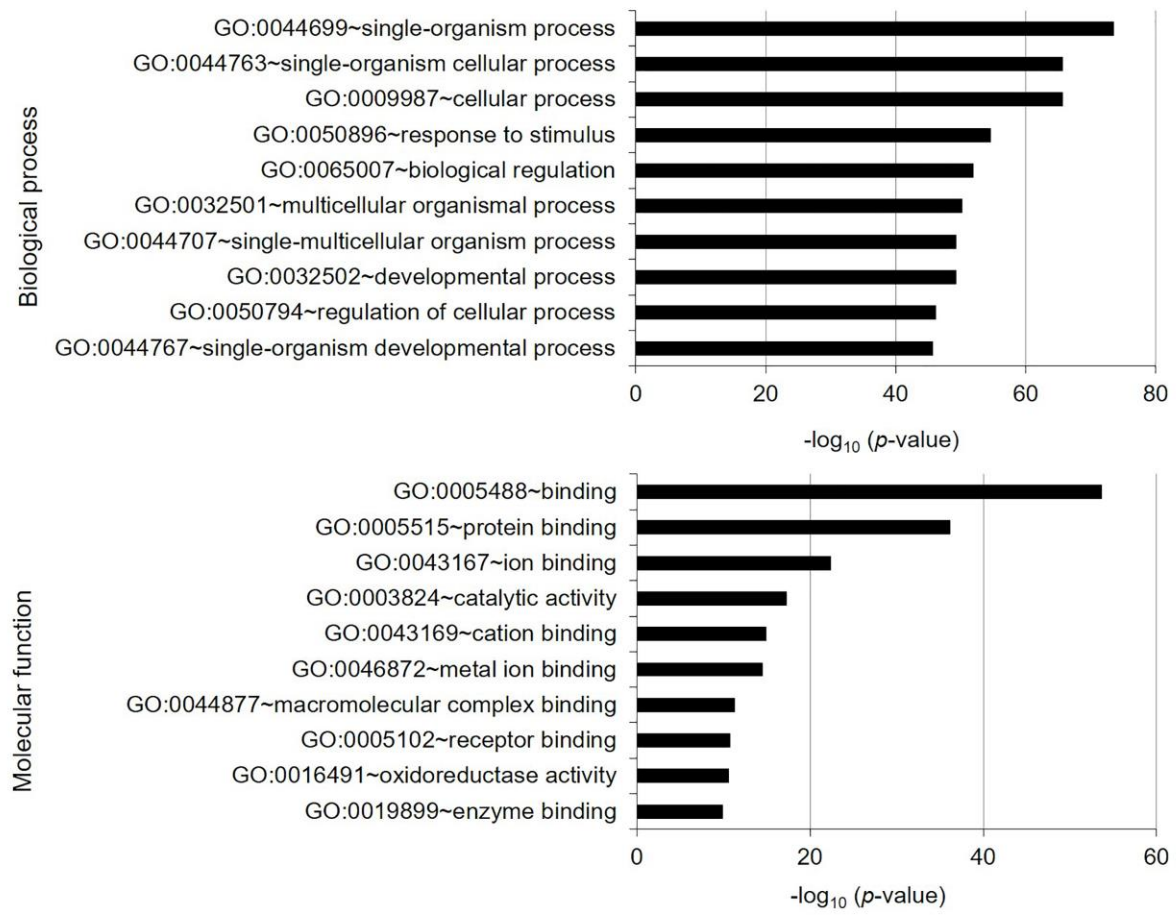

**Figure S2.** The top ten enriched GO terms. The GO terms were obtained from pathway enrichment analysis of differentially expressed genes (DEGs;  $|\text{fold changes}| > 2$ ,  $p\text{-value} < 0.05$ ) in SZ95 sebocytes with  $\text{PM}_{2.5}$  treatments. Bars represent  $-\log_{10}(p\text{-value})$ .  $P$ -values were calculated by modified Fisher's exact tests.

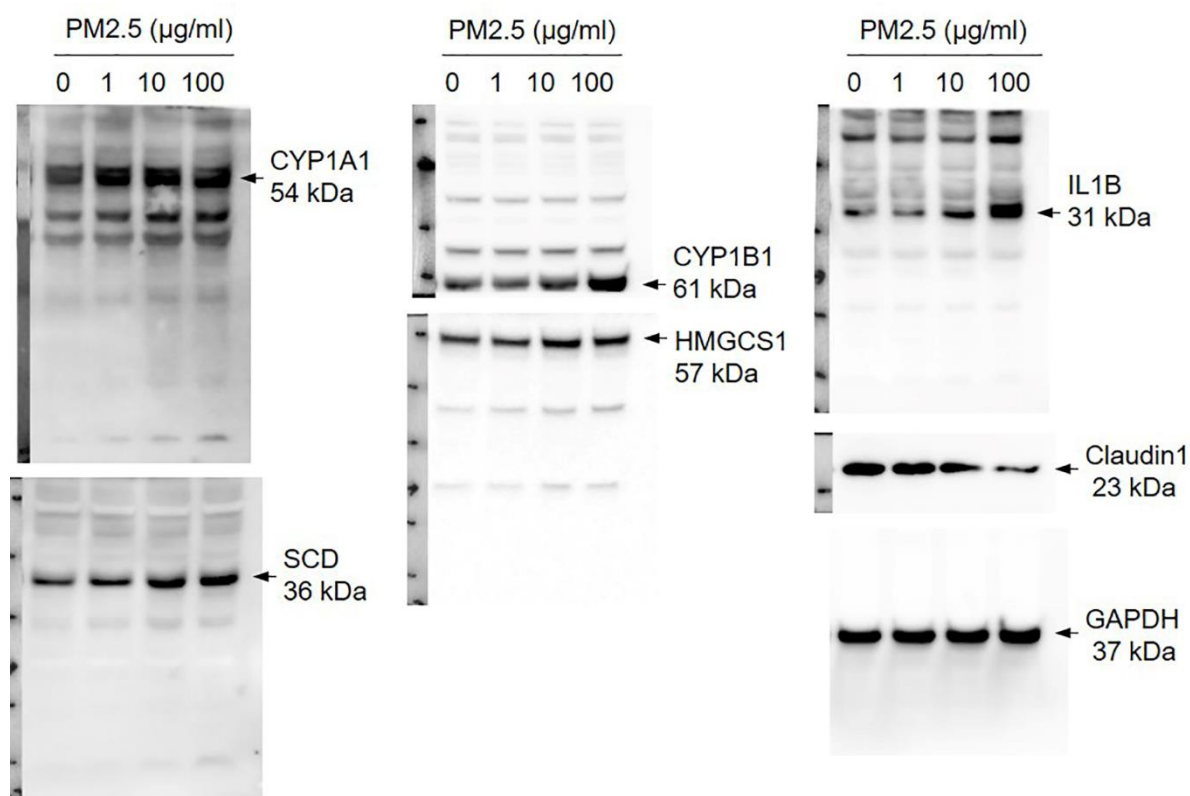

**Figure S3.** PM<sub>2.5</sub> alters the expression levels of xenobiotic metabolism, inflammatory response, oxidative stress, lipid metabolism, and cell barrier-related factors. SZ95 sebocytes were treated with PM<sub>2.5</sub> for 48 h. The cells were lysed with RIPA lysis buffer. The lysate was separated by SDS-PAGE, and immunoblotting was performed. The western blot shows the full blot data for the proteins indicated in Figure 1d, which are cytochrome P450 family 1 subfamily A member 1 (CYP1A1), CYP1B1, stearoyl-CoA desaturase (SCD), 3-hydroxy-3-methylglutaryl-CoA synthase 1 (HMGCS1), claudin 1, interleukin 1 beta (IL1B), and glyceraldehyde 3-phosphate dehydrogenase (GAPDH).

(a)

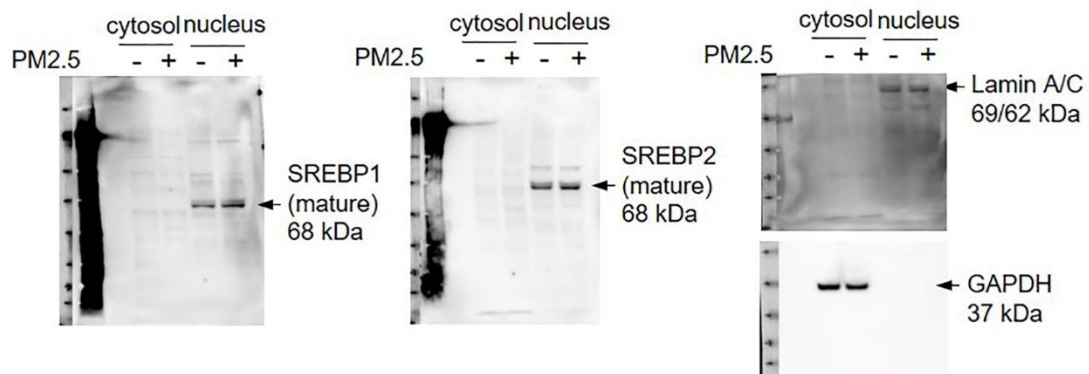

(b)

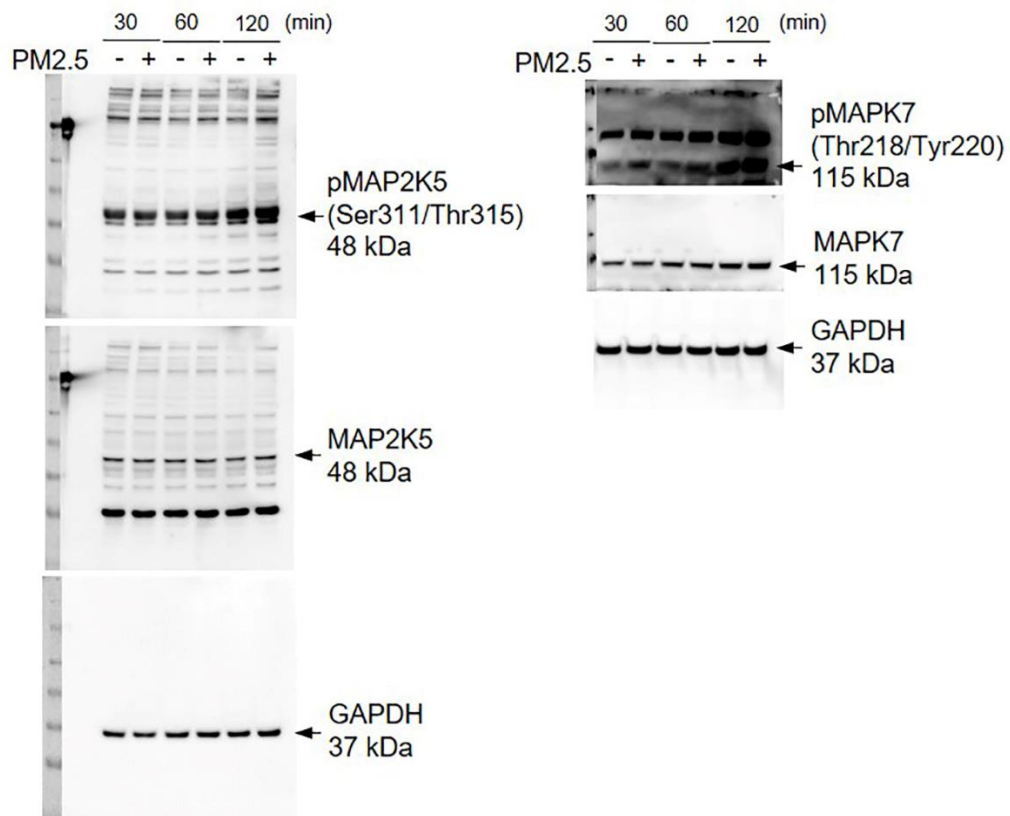

(c)

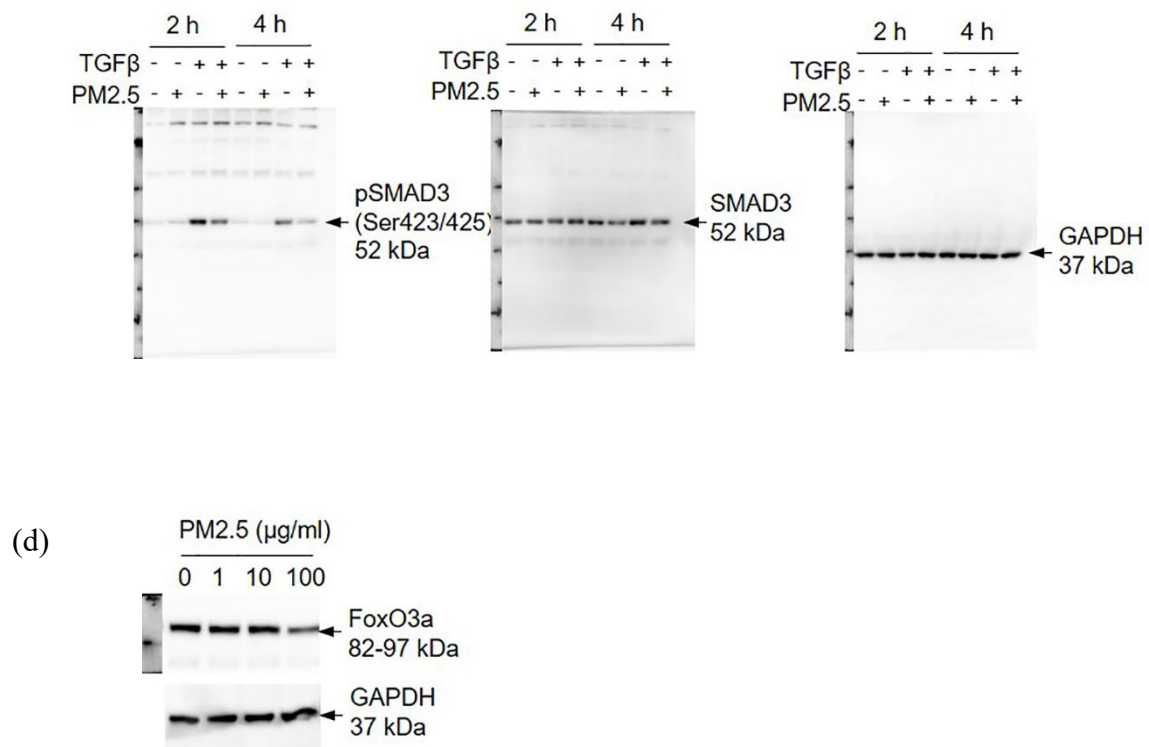

**Figure S4.** PM<sub>2.5</sub> affects SREBP-, MAPK-, TGFβ-SMAD3-, and FoxO3a-related signaling. (a) SZ95 sebocytes treated with PM<sub>2.5</sub> (100 μg/mL) for 48 h. The cells were lysed with hypotonic buffer, then the cytosolic fraction and nuclei were separated. SZ95 sebocytes treated with PM<sub>2.5</sub> or TGFβ for the indicated times (b,c) or 48 h (d). The cells were lysed with RIPA lysis buffer. The lysate was separated by SDS-PAGE, and immunoblotting was performed for the indicated proteins. The western blot shows the full blot data for the proteins indicated in Figure 2, which are sterol regulatory element binding proteins (SREBPs), lamin A/C, mitogen-activated protein kinase 7 (MAPK7), MAP2K5, SMAD3, forkhead Box O3a (FoxO3a), and GAPDH.

## Supplementary Table

**Table S1** DEGs ( $|\text{fold changes}| > 2$ ,  $p\text{-value} < 0.05$ ) by  $\text{PM}_{2.5}$  in SZ95 sebocytes.  $P$ -values were calculated by the negative binomial Wald test and Benjamini–Hochberg correction (adjusted  $p$ -value).

| Gene category                            | Transcript_ID | Gene Symbol | Description                                     | Fold change | p-value                 | Adjusted p-value        |
|------------------------------------------|---------------|-------------|-------------------------------------------------|-------------|-------------------------|-------------------------|
| Xenobiotic metabolism and Detoxification | NM_000499     | CYP1A1      | Cytochrome P450 family 1 subfamily A member 1   | 130.59      | 0                       | 0                       |
|                                          | NM_000104     | CYP1B1      | Cytochrome P450 family 1 subfamily B member 1   | 22.18       | 0                       | 0                       |
|                                          | NM_001072     | UGT1A6      | UDP glucuronosyltransferase family 1 member A6  | 5.83        | $5.87 \times 10^{-179}$ | $2.36 \times 10^{-175}$ |
|                                          | NM_001242412  | AHRR        | Aryl-hydrocarbon receptor repressor             | 3.71        | $1.92 \times 10^{-122}$ | $5.15 \times 10^{-119}$ |
|                                          | NM_175617     | MT1E        | Metallothionein 1E                              | 3.56        | $2.70 \times 10^{-102}$ | $4.81 \times 10^{-99}$  |
|                                          | NM_001270364  | ALDH1L1     | Aldehyde dehydrogenase 1 family member L1       | 2.98        | $3.89 \times 10^{-37}$  | $5.79 \times 10^{-35}$  |
|                                          | NM_000691     | ALDH3A1     | Aldehyde dehydrogenase 3 family member A1       | 2.91        | $3.77 \times 10^{-20}$  | $1.68 \times 10^{-18}$  |
|                                          | NM_005953     | MT2A        | Metallothionein 2A                              | 2.81        | $3.10 \times 10^{-72}$  | $1.84 \times 10^{-69}$  |
|                                          | NM_015567     | SLITRK5     | SLIT and NTRK like family member 5              | 2.78        | $4.13 \times 10^{-12}$  | $6.85 \times 10^{-11}$  |
|                                          | NM_019093     | UGT1A3      | UDP glucuronosyltransferase family 1 member A3  | 2.48        | $2.99 \times 10^{-8}$   | $2.69 \times 10^{-7}$   |
|                                          | NR_027252     | CYP1B1-AS1  | CYP1B1 antisense RNA 1                          | 2.47        | $1.87 \times 10^{-7}$   | $1.47 \times 10^{-6}$   |
|                                          | NM_176870     | MT1M        | Metallothionein 1M                              | 2.12        | $1.73 \times 10^{-5}$   | $9.26 \times 10^{-5}$   |
|                                          | NM_005952     | MT1X        | Metallothionein 1X                              | 2.11        | $9.78 \times 10^{-22}$  | $4.93 \times 10^{-20}$  |
|                                          | NM_000848     | GSTM2       | Glutathione S-transferase mu 2                  | 2.05        | $1.00 \times 10^{-11}$  | $1.58 \times 10^{-10}$  |
|                                          | NM_001054     | SULT1A2     | Sulfotransferase family 1A member 2             | 2.02        | $2.33 \times 10^{-13}$  | $4.58 \times 10^{-12}$  |
|                                          | NM_000146     | FTL         | Ferritin light chain                            | 2.00        | $3.49 \times 10^{-45}$  | $6.91 \times 10^{-43}$  |
|                                          | NM_000782     | CYP24A1     | Cytochrome P450 family 24 subfamily A member 1  | -3.47       | $8.58 \times 10^{-57}$  | $2.65 \times 10^{-54}$  |
|                                          | NM_000779     | CYP4B1      | Cytochrome P450 family 4 subfamily B member 1   | -3.09       | $1.89 \times 10^{-91}$  | $2.53 \times 10^{-88}$  |
|                                          | NM_001033044  | GLUL        | Glutamate-ammonia ligase (glutamine synthetase) | -2.85       | $2.60 \times 10^{-11}$  | $3.79 \times 10^{-10}$  |
|                                          | NM_018475     | TMEM165     | Transmembrane protein 165                       | -2.29       | $1.68 \times 10^{-68}$  | $8.17 \times 10^{-66}$  |
|                                          | NM_000765     | CYP3A7      | Cytochrome P450 family 3 subfamily A member 7   | -2.27       | $1.97 \times 10^{-7}$   | $1.54 \times 10^{-6}$   |
|                                          | NM_005420     | SULT1E1     | Sulfotransferase family 1E member 1             | -2.26       | $4.55 \times 10^{-10}$  | $5.48 \times 10^{-9}$   |

|                       |              |           |                                                                |       |                         |                         |
|-----------------------|--------------|-----------|----------------------------------------------------------------|-------|-------------------------|-------------------------|
|                       | NM_000689    | ALDH1A1   | Aldehyde dehydrogenase 1 family member A1                      | -2.21 | $9.16 \times 10^{-12}$  | $1.45 \times 10^{-10}$  |
|                       | NR_144551    | CYP2T1P   | Cytochrome P450 family 2 subfamily T member 1, pseudogene      | -2.04 | $2.74 \times 10^{-12}$  | $4.64 \times 10^{-11}$  |
|                       | NM_001142776 | CHAC1     | ChaC glutathione specific $\gamma$ -glutamylcyclotransferase 1 | -2.04 | $2.14 \times 10^{-12}$  | $3.68 \times 10^{-11}$  |
| Inflammatory response | NM_001302123 | CXCL11    | C-X-C motif chemokine ligand 11                                | 2.56  | $3.76 \times 10^{-12}$  | $6.27 \times 10^{-11}$  |
|                       | NM_000576    | IL1B      | Interleukin 1 $\beta$                                          | 2.48  | $3.20 \times 10^{-12}$  | $5.37 \times 10^{-11}$  |
|                       | NM_001350888 | AK7       | Adenylate kinase 7                                             | 2.32  | $6.48 \times 10^{-20}$  | $2.82 \times 10^{-18}$  |
|                       | NM_001066    | TNFRSF1B  | TNF receptor superfamily member 1B                             | 2.17  | $2.24 \times 10^{-12}$  | $3.83 \times 10^{-11}$  |
|                       | NM_000600    | IL6       | Interleukin 6                                                  | 2.03  | $9.47 \times 10^{-9}$   | $9.34 \times 10^{-8}$   |
|                       | NM_001190942 | TNFSF10   | TNF superfamily member 10                                      | -3.95 | $8.12 \times 10^{-136}$ | $2.60 \times 10^{-132}$ |
|                       | NM_003357    | SCGB1A1   | Secretoglobin family 1A member 1                               | -3.18 | $6.64 \times 10^{-211}$ | $3.12 \times 10^{-19}$  |
|                       | NM_004795    | KL        | Klotho                                                         | -3.10 | $8.08 \times 10^{-64}$  | $3.24 \times 10^{-61}$  |
|                       | NM_001511    | CXCL1     | C-X-C motif chemokine ligand 1                                 | -2.89 | $1.94 \times 10^{-14}$  | $4.38 \times 10^{-13}$  |
|                       | NM_002546    | TNFRSF11B | TNF receptor superfamily member 11b                            | -2.87 | $9.74 \times 10^{-14}$  | $2.01 \times 10^{-12E}$ |
|                       | NM_002993    | CXCL6     | C-X-C motif chemokine ligand 6                                 | -2.49 | $8.65 \times 10^{-11}$  | $1.17 \times 10^{-9}$   |
|                       | NM_001291737 | CD24      | CD24 molecule                                                  | -2.38 | $1.33 \times 10^{-118}$ | $3.04 \times 10^{-115}$ |
|                       | NM_001005474 | NFKBIZ    | NF $\kappa$ B inhibitor zeta                                   | -2.23 | $2.18 \times 10^{-49}$  | $5.07 \times 10^{-47}$  |
|                       | NM_144717    | IL20RB    | interleukin 20 receptor subunit beta                           | -2.20 | $1.16 \times 10^{-24}$  | $7.51 \times 10^{-23}$  |
|                       | NM_003246    | THBS1     | Thrombospondin 1                                               | -2.18 | $1.49 \times 10^{-10}$  | $1.93 \times 10^{-9}$   |
|                       | NM_001319196 | S100A8    | S100 calcium binding protein A8                                | -2.03 | $1.57 \times 10^{-6}$   | $1.04 \times 10^{-5}$   |
| Oxidative stress      | NM_000857    | GUCY1B3   | Guanylate cyclase 1 soluble subunit beta                       | 3.64  | $2.17 \times 10^{-25}$  | $1.51 \times 10^{-23}$  |
|                       | NM_001123066 | MAPT      | Microtubule associated protein tau                             | 2.38  | $1.43 \times 10^{-10}$  | $1.87 \times 10^{-9}$   |
|                       | NM_001135241 | AKR1C2    | Aldo-keto reductase family 1 member C2                         | 2.19  | $8.52 \times 10^{-6}$   | $4.87 \times 10^{-5}$   |
|                       | NM_000962    | PTGS1     | Prostaglandin-endoperoxide synthase 1                          | 2.16  | $1.25 \times 10^{-28}$  | $1.09 \times 10^{-26}$  |
|                       | NM_001321015 | GATM      | Glycine amidinotransferase                                     | 2.11  | $2.36 \times 10^{-23}$  | $1.40 \times 10^{-21}$  |
|                       | NM_000345    | SNCA      | Synuclein alpha                                                | 2.08  | $7.58 \times 10^{-11}$  | $1.03 \times 10^{-9}$   |
|                       | NM_000878    | IL2RB     | Interleukin 2 receptor subunit beta                            | 2.00  | $3.39 \times 10^{-8}$   | $3.02 \times 10^{-7}$   |
|                       | NM_000930    | plat      | Plasminogen activator, tissue type (tPA)                       | -4.59 | $3.78 \times 10^{-86}$  | $3.57 \times 10^{-83}$  |
|                       | NM_005066    | SFPQ      | Splicing factor proline and glutamine rich                     | -2.54 | $1.56 \times 10^{-59}$  | $5.33 \times 10^{-57}$  |
|                       | NM_005252    | FOS       | Fos proto-oncogene, AP-1 transcription factor subunit          | -2.36 | $3.31 \times 10^{-19}$  | $1.31 \times 10^{-17}$  |
|                       | NM_001143818 | SERPINB2  | Serpin family B member                                         | -2.07 | $5.01 \times$           | $1.68 \times$           |

|                                |              |         |                                                       |       |                               |                               |
|--------------------------------|--------------|---------|-------------------------------------------------------|-------|-------------------------------|-------------------------------|
|                                |              |         | 2                                                     |       | 10 <sup>-59</sup>             | 10 <sup>-56</sup>             |
|                                | NM_003356    | UCP3    | Uncoupling protein 3                                  | -2.02 | 3.11 × 10 <sup>-7</sup>       | 2.33 × 10 <sup>-6</sup>       |
| Lipid metabolism               | NM_001142807 | ACOXL   | Acyl-CoA oxidase like                                 | 3.88  | 3.52 × 10 <sup>-70</sup> E-70 | 1.88 × 10 <sup>-67</sup> E-67 |
|                                | NM_000527    | LDLR    | Low density lipoprotein receptor                      | 3.18  | 3.98 × 10 <sup>-78</sup>      | 2.78 × 10 <sup>-75</sup>      |
|                                | NM_174936    | PCSK9   | Proprotein convertase subtilisin/kexin type 9         | 2.93  | 3.21 × 10 <sup>-60</sup>      | 1.17 × 10 <sup>-5</sup>       |
|                                | NM_001017369 | MSMO1   | Methylsterol monooxygenase 1                          | 2.64  | 6.14 × 10 <sup>-50</sup>      | 1.49 × 10 <sup>-47</sup>      |
|                                | NM_005063    | SCD     | Stearoyl-CoA desaturase                               | 2.42  | 6.36 × 10 <sup>-62</sup>      | 2.37 × 10 <sup>-59</sup>      |
|                                | NM_001076552 | ACSS2   | Acyl-CoA synthetase short-chain family member 2       | 2.36  | 5.06 × 10 <sup>-87</sup>      | 5.08 × 10 <sup>-84</sup>      |
|                                | NM_001346590 | INSIG1  | Insulin induced gene 1                                | 2.25  | 8.28 × 10 <sup>-50</sup>      | 1.96 × 10 <sup>-47</sup>      |
|                                | NM_001163817 | DHCR7   | 7-dehydrocholesterol reductase                        | 2.16  | 3.18 × 10 <sup>-76</sup>      | 2.04 × 10 <sup>-73</sup>      |
|                                | NM_001098272 | HMGCS1  | 3-hydroxy-3-methylglutaryl-CoA synthase 1             | 2.01  | 1.09 × 10 <sup>-8</sup>       | 1.06 × 10 <sup>-7</sup>       |
|                                | NM_000253    | MTTP    | Microsomal triglyceride transfer protein              | 2.01  | 8.67 × 10 <sup>-5</sup>       | 3.91 × 10 <sup>-4</sup>       |
|                                | NM_005544    | IRS1    | Insulin receptor substrate 1                          | -3.20 | 3.85 × 10 <sup>-39</sup>      | 6.11 × 10 <sup>-37</sup>      |
|                                | NM_000599    | IGFBP5  | Insulin like growth factor binding protein 5          | -2.44 | 5.72 × 10 <sup>-7</sup>       | 4.10 × 10 <sup>-6</sup>       |
|                                | NM_003561    | PLA2G10 | Phospholipase A2 group X                              | -2.29 | 2.37 × 10 <sup>-12</sup>      | 4.05 × 10 <sup>-11</sup>      |
|                                | NM_001172895 | CAV1    | Caveolin 1                                            | -2.13 | 4.93 × 10 <sup>-44</sup>      | 9.32 × 10 <sup>-42</sup>      |
|                                | NM_001285829 | CEBPA   | CCAAT/enhancer binding protein alpha                  | -2.01 | 1.33 × 10 <sup>-19</sup>      | 5.53 × 10 <sup>-1</sup>       |
| Cell adhesion and cell barrier | NM_001254750 | CD6     | CD6 molecule                                          | 2.75  | 7.43 × 10 <sup>-11</sup>      | 1.01 × 10 <sup>-9</sup>       |
|                                | NM_001252335 | CGNL1   | Cingulin like 1                                       | 2.25  | 7.36 × 10 <sup>-24</sup>      | 4.58 × 10 <sup>-22</sup>      |
|                                | NM_020884    | MYH7B   | Myosin heavy chain 7B                                 | 2.00  | 4.81 × 10 <sup>-9</sup>       | 4.97 × 10 <sup>-8</sup>       |
|                                | NM_001185056 | CLDN11  | Claudin 11                                            | -3.48 | 2.19 × 10 <sup>-36</sup>      | 3.06 × 10 <sup>-34</sup>      |
|                                | NM_001001890 | RUNX1   | Runt related transcription factor 1                   | -2.38 | 1.97 × 10 <sup>-72</sup>      | 1.22 × 10 <sup>-69</sup>      |
|                                | NM_000492    | CFTR    | Cystic fibrosis transmembrane conductance regulator   | -2.31 | 8.48 × 10 <sup>-20</sup>      | 3.64 × 10 <sup>-18</sup>      |
|                                | NM_001795    | CDH5    | Cadherin 5                                            | -2.23 | 4.31 × 10 <sup>-57</sup>      | 1.36 × 10 <sup>-54</sup>      |
|                                | NM_001308176 | CDH2    | Cadherin 2                                            | -2.15 | 1.66 × 10 <sup>-12</sup>      | 2.90 × 10 <sup>-11</sup>      |
|                                | NM_001271899 | PPP2R2B | Protein phosphatase 2 regulatory subunit Bbeta        | -2.14 | 9.85 × 10 <sup>-16</sup>      | 2.67 × 10 <sup>-14</sup>      |
|                                | NM_198722    | AMIGO3  | Adhesion molecule with Ig like domain 3               | -2.14 | 5.85 × 10 <sup>-16</sup>      | 1.61 × 10 <sup>-14</sup>      |
|                                | NM_001253849 | VTCN1   | V-set domain containing T-cell activation inhibitor 1 | -2.14 | 3.19 × 10 <sup>-82</sup>      | 2.56 × 10 <sup>-79</sup>      |
|                                | NM_014141    | CNTNAP2 | Contactin associated protein-like 2                   | -2.09 | 1.69 × 10 <sup>-23</sup>      | 1.01 × 10 <sup>-21</sup>      |
|                                | NM_021101    | CLDN1   | Claudin 1                                             | -2.08 | 2.02 × 10 <sup>-67</sup>      | 9.25 × 10 <sup>-65</sup>      |
